# Supplementary material
Source: ML conference proceedings conference paper supplement (https://openreview.net/forum?id=bkzkCHSYp9)
Supplement: supplementary_material [file attachment]

# Multivariate Independence Testing (Increasing Sample Size)

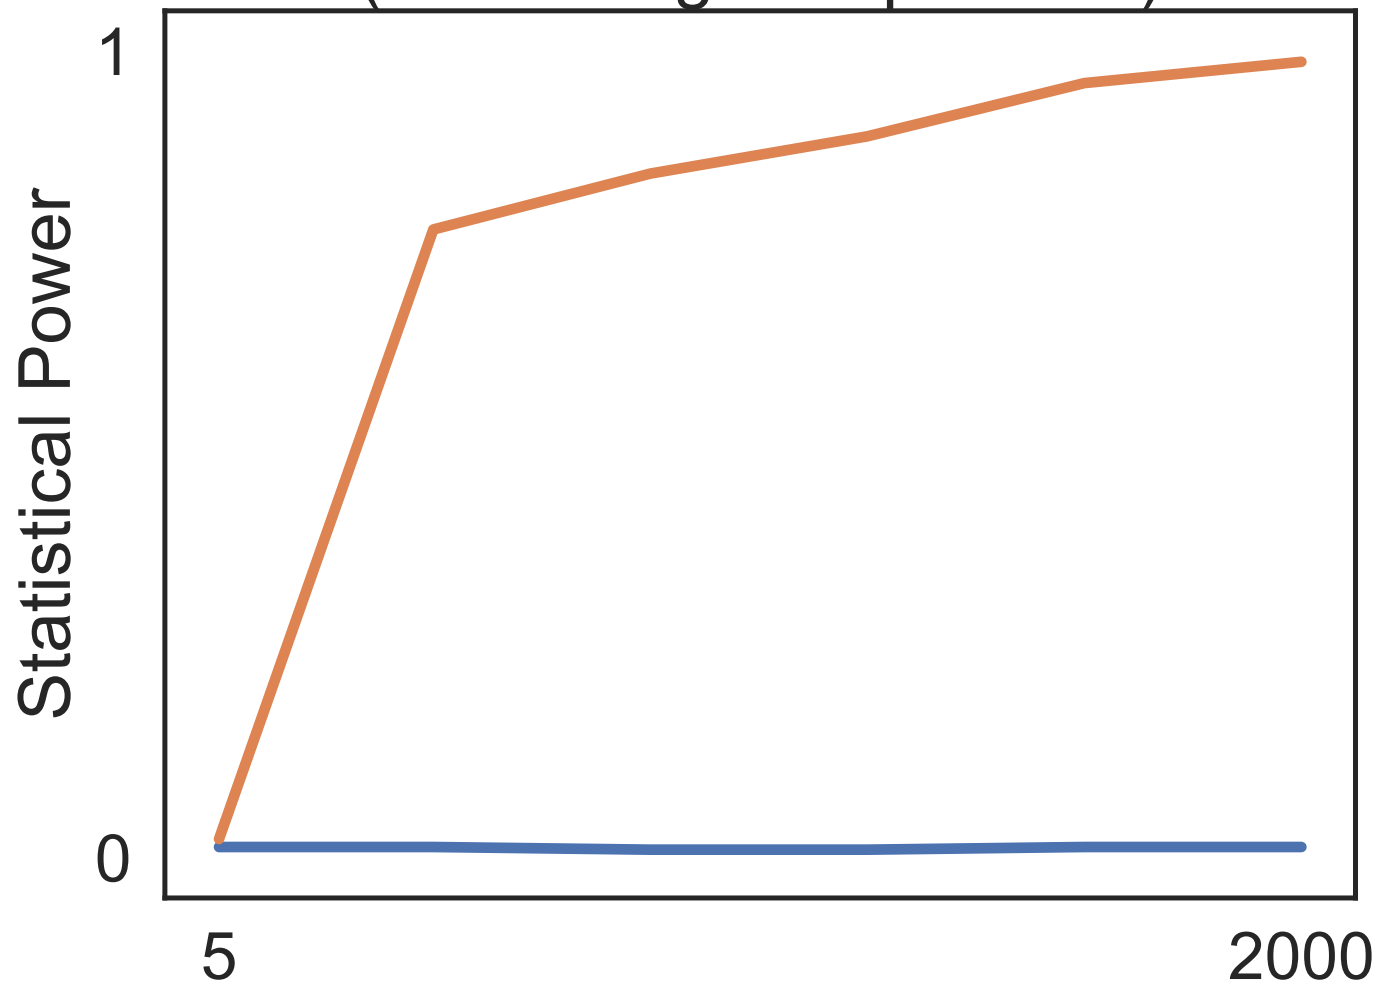

— True Positive Probability

— False Positive Probability
