# Supplementary material
Source: ML conference proceedings conference paper supplement (https://openreview.net/forum?id=bkzkCHSYp9)
Supplement: supplementary_material [file attachment]

# Two-Sample Simulations

Linear

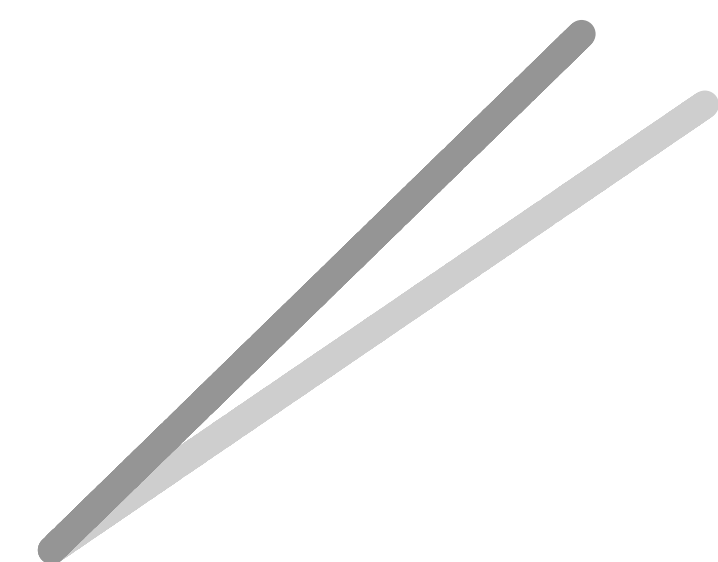

Exponential

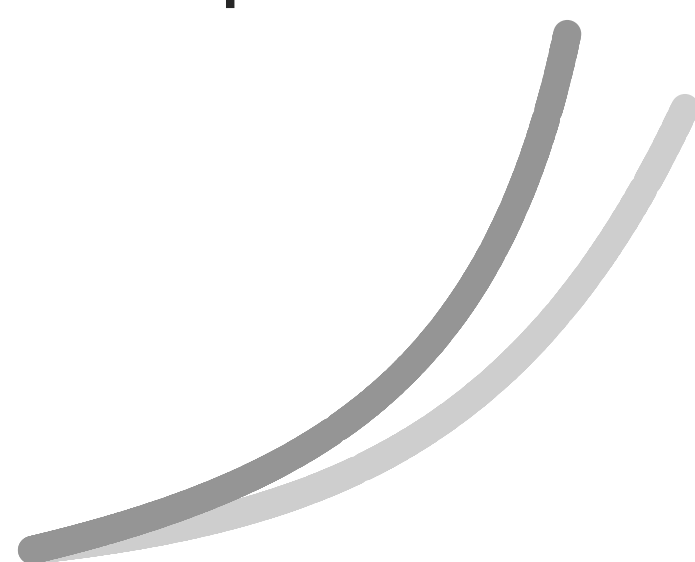

Cubic

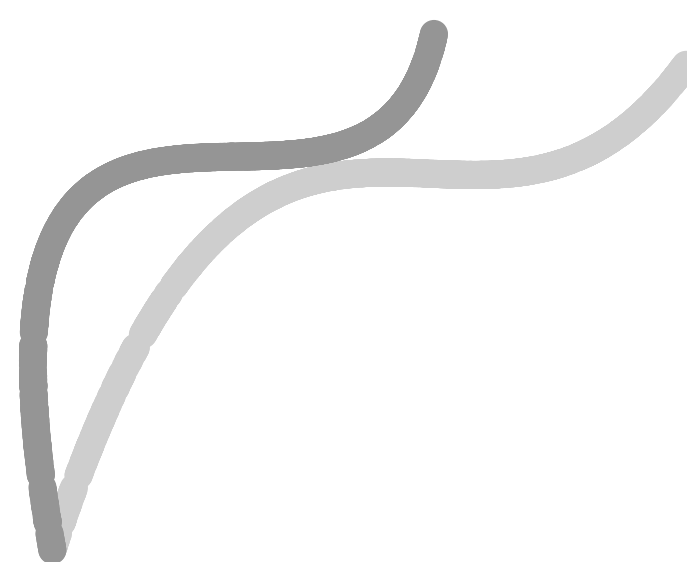

Joint Normal

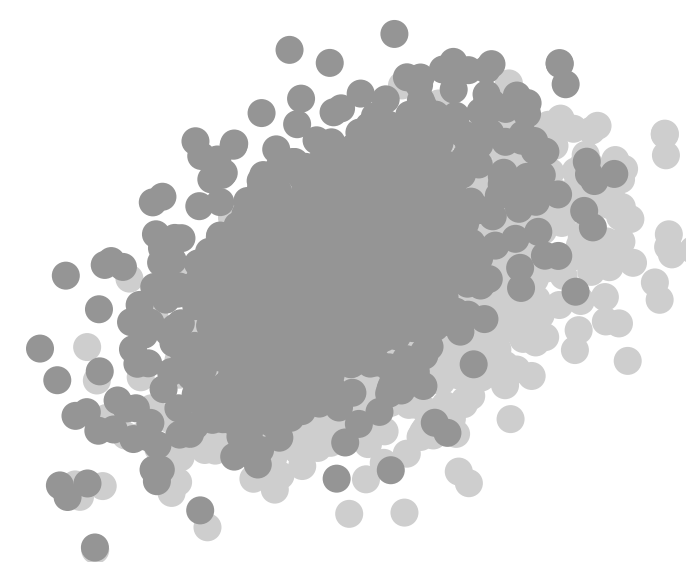

Step

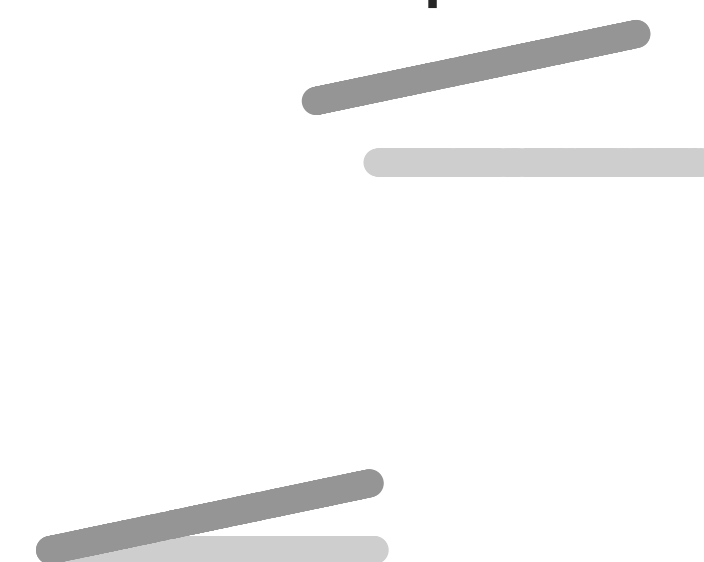

Quadratic

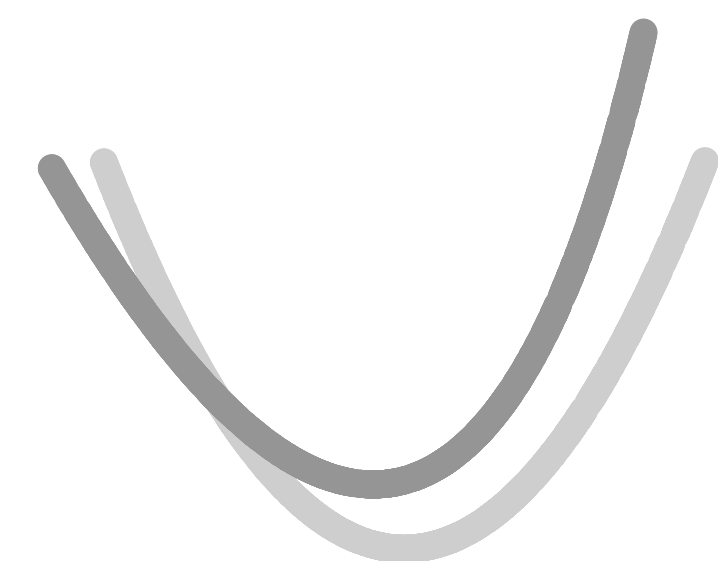

W-Shaped

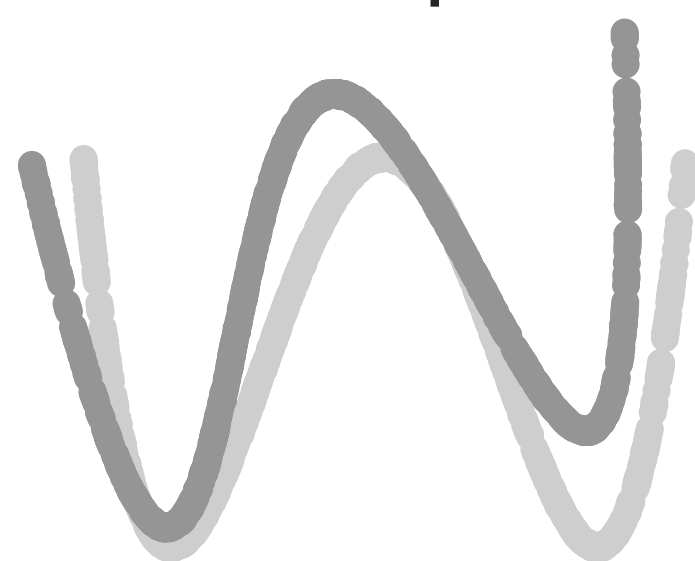

Spiral

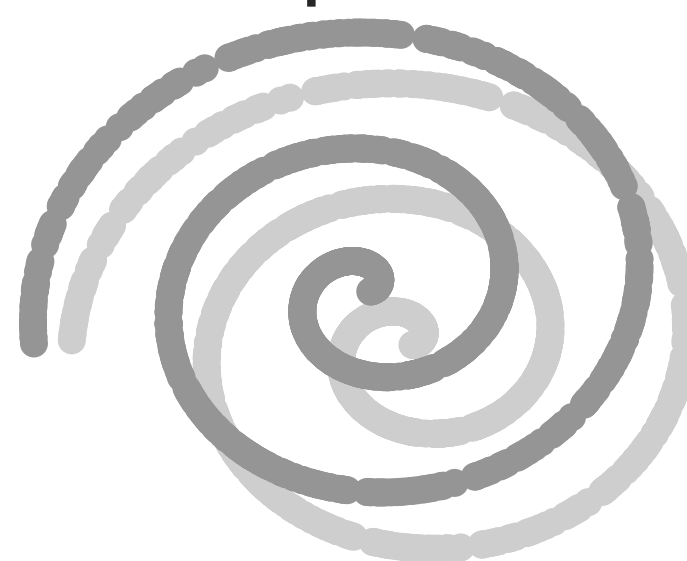

Bernoulli

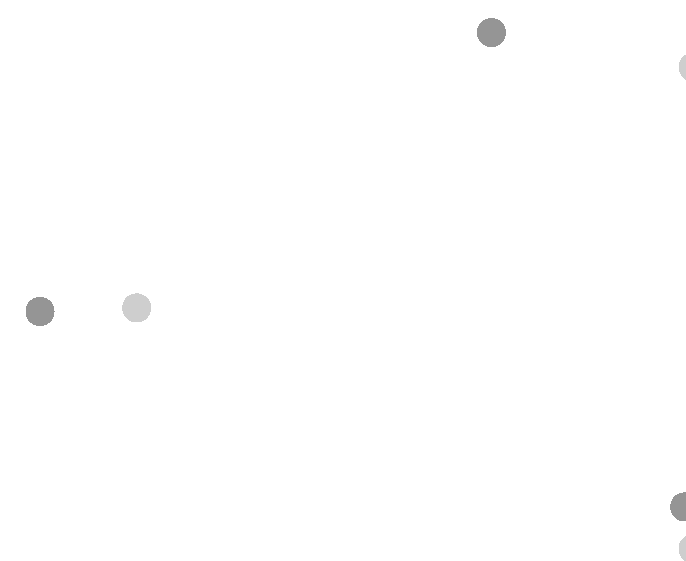

Logarithmic

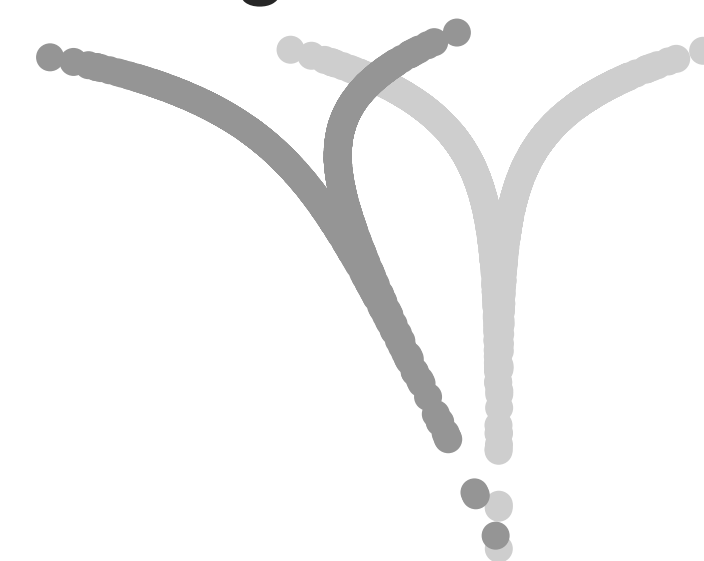

Fourth Root

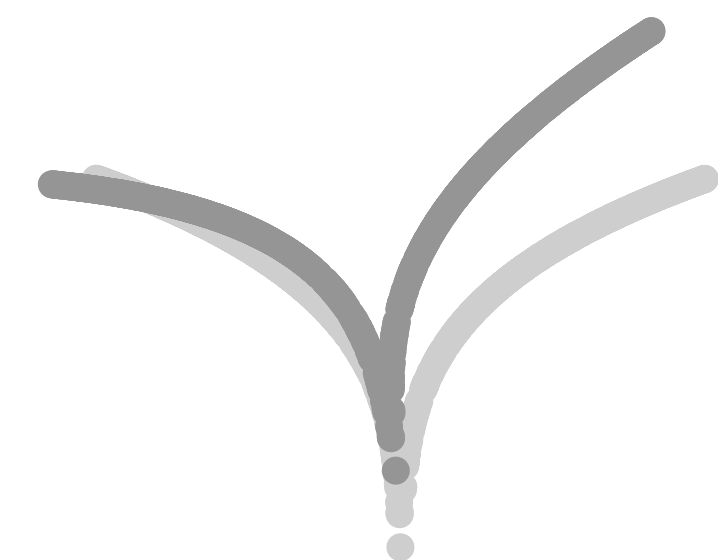

Sine  $4\pi$

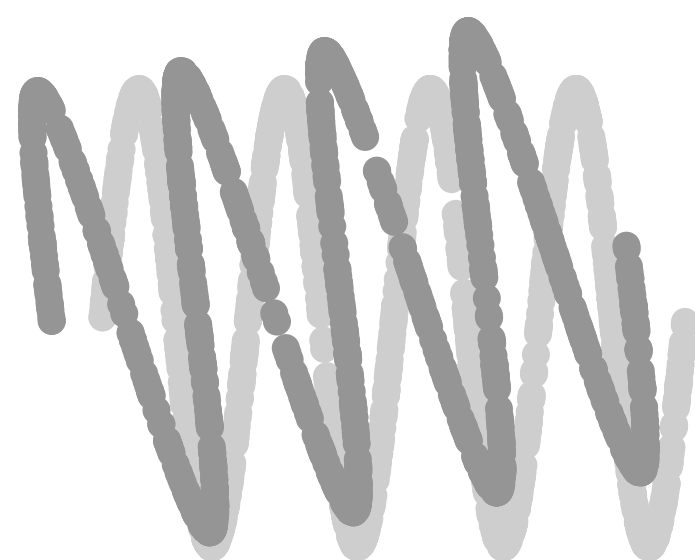

Sine  $16\pi$

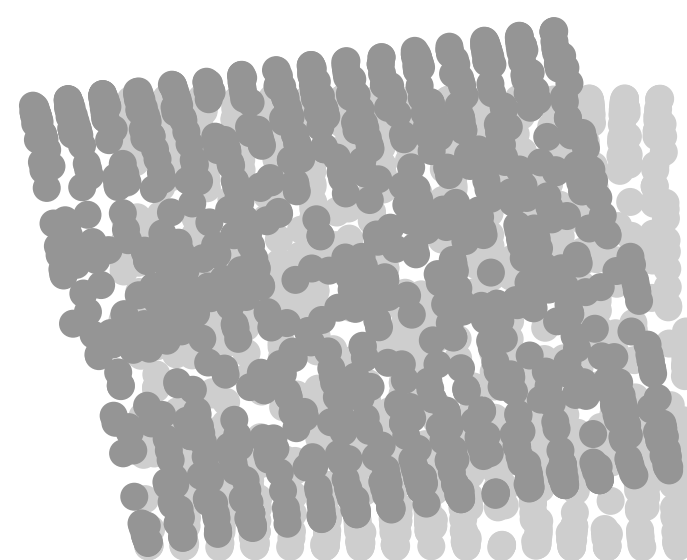

Square

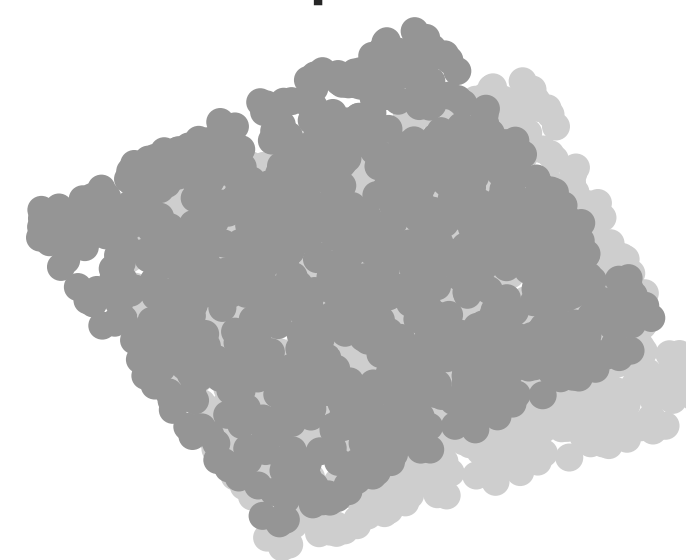

Two Parabolas

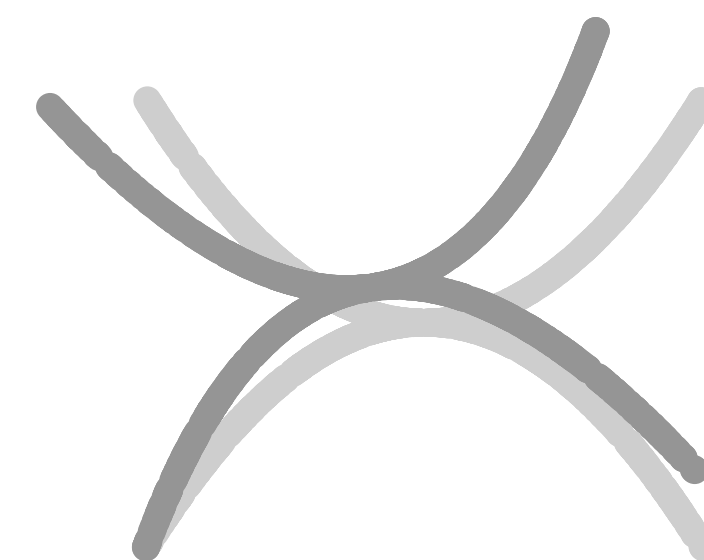

Circle

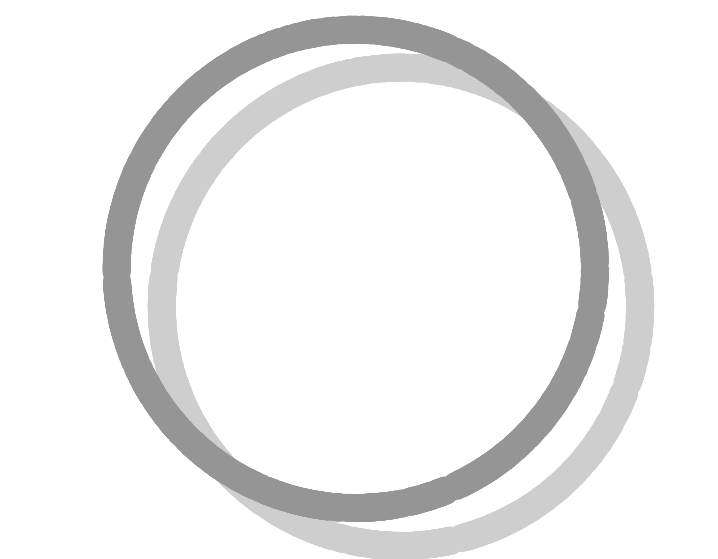

Ellipse

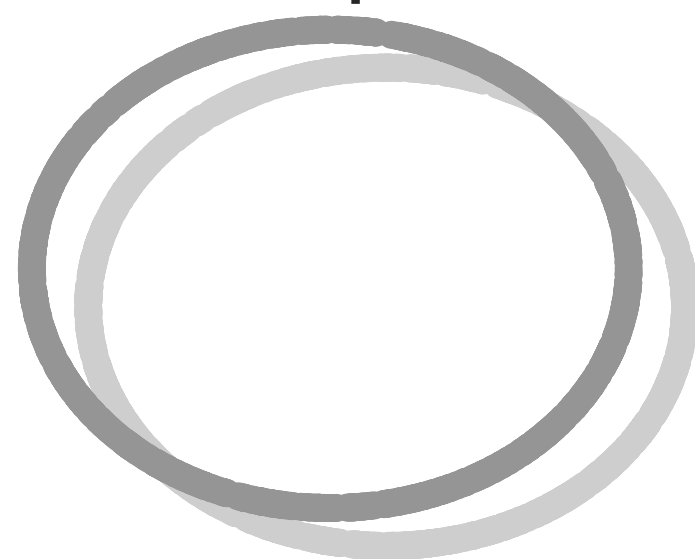

Diamond

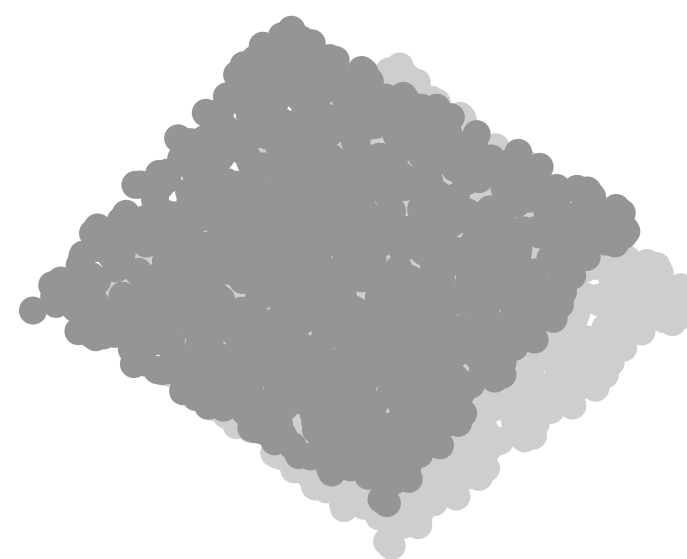

Noise

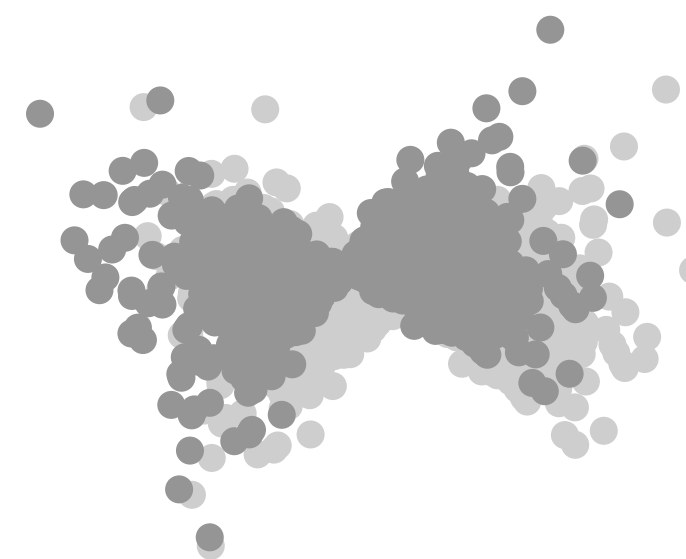

Independence

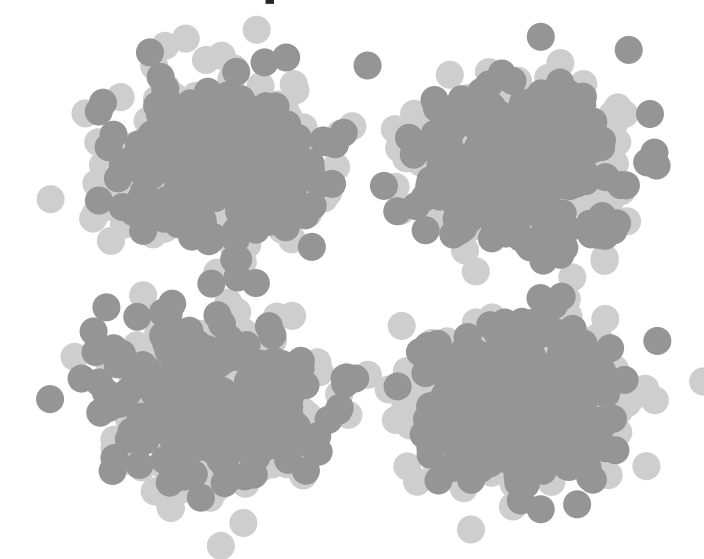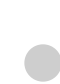

Sample 1

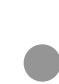

Sample 2
