# Supplementary material
Source: ML conference proceedings conference paper supplement (https://openreview.net/forum?id=bkzkCHSYp9)

# Cancer Biomarker Discovery

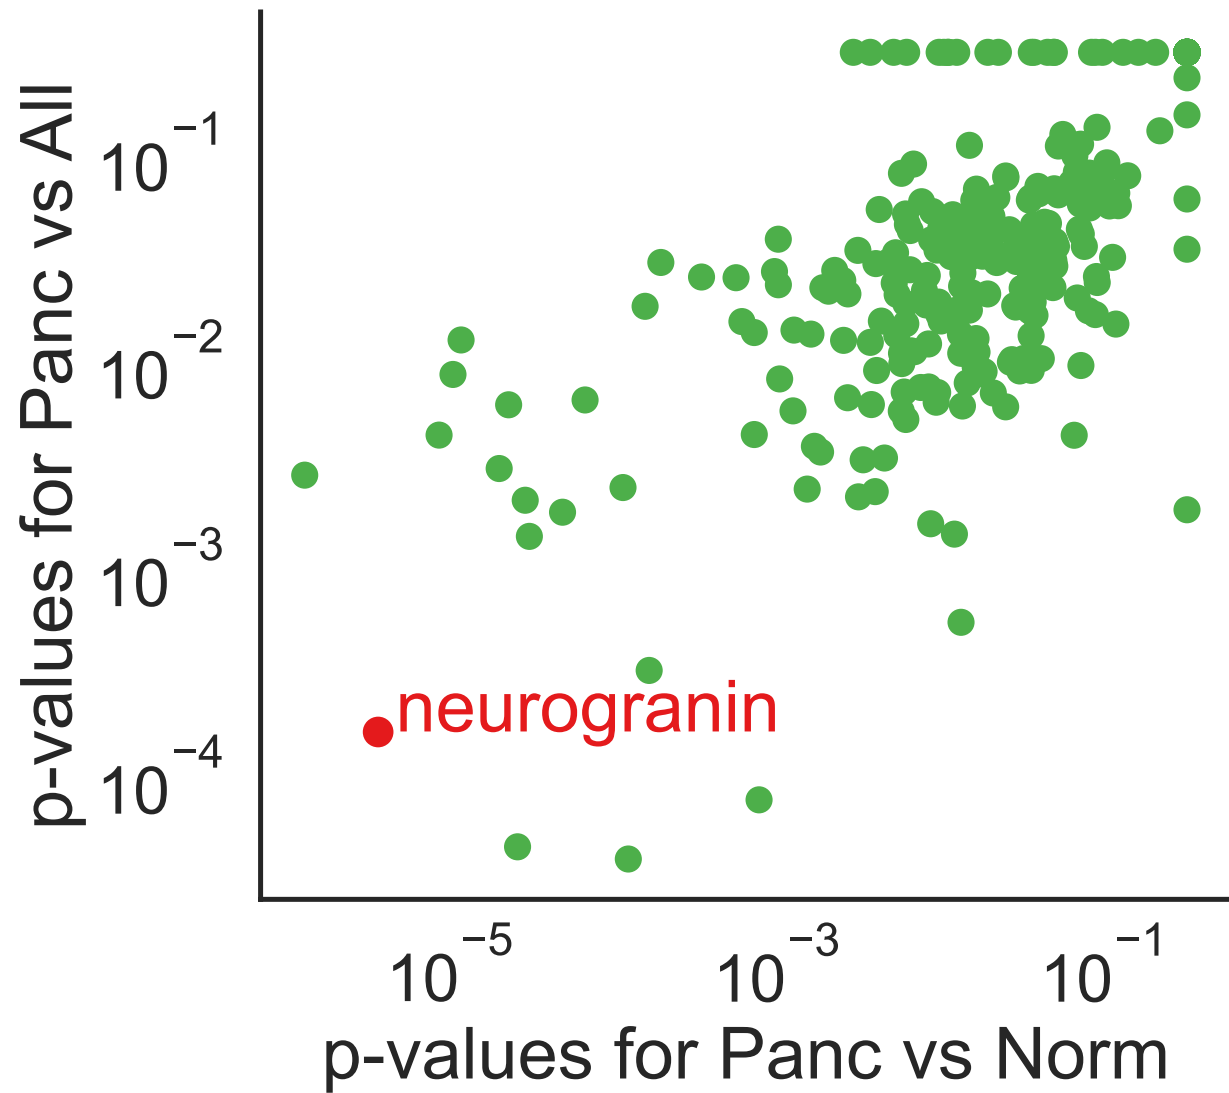

# Biomarker kNN Classification

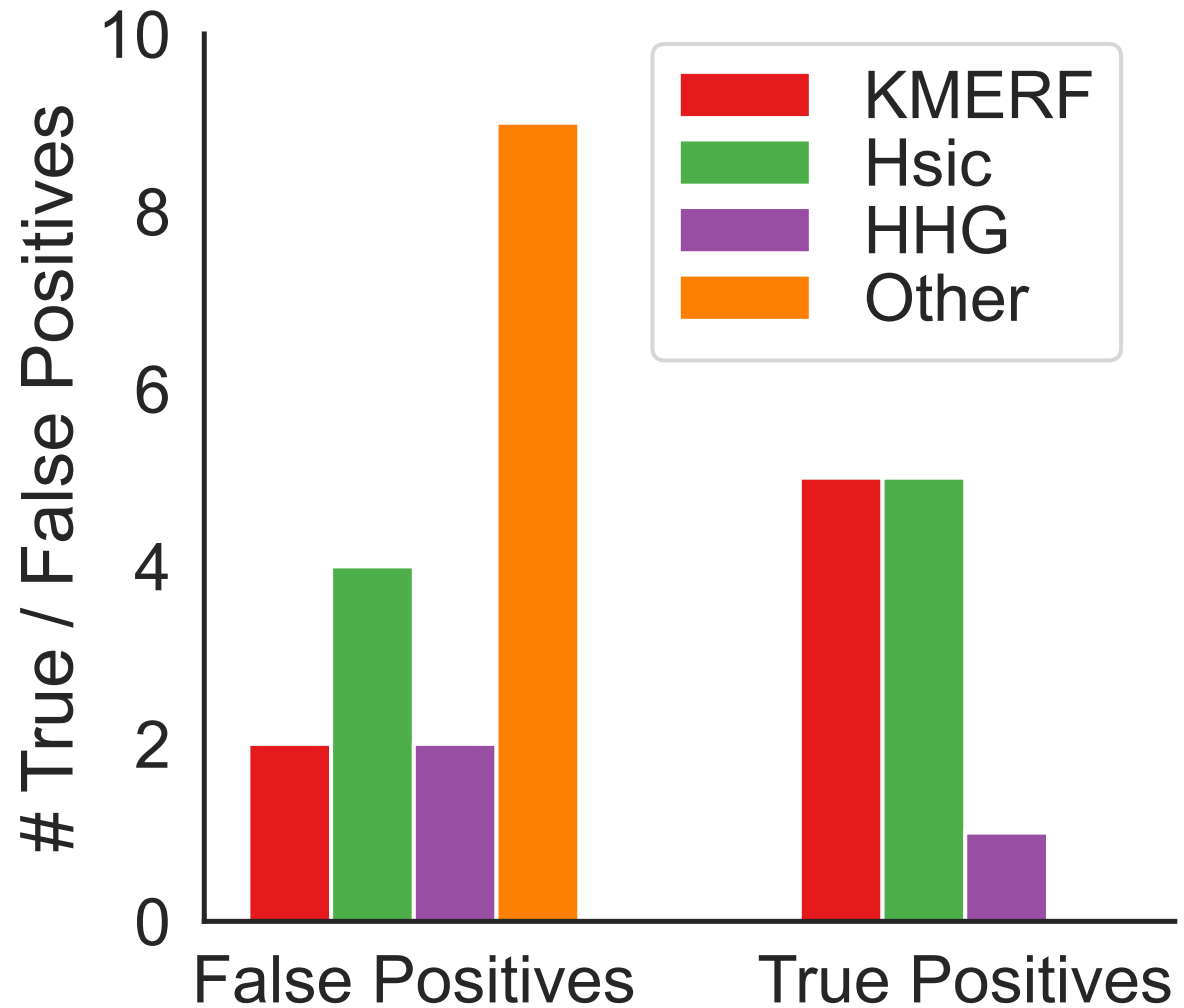

Supplement: supplementary_material [file attachment]

# Multivariate Two-Sample Testing (Increasing Dimension)

Statistical Power

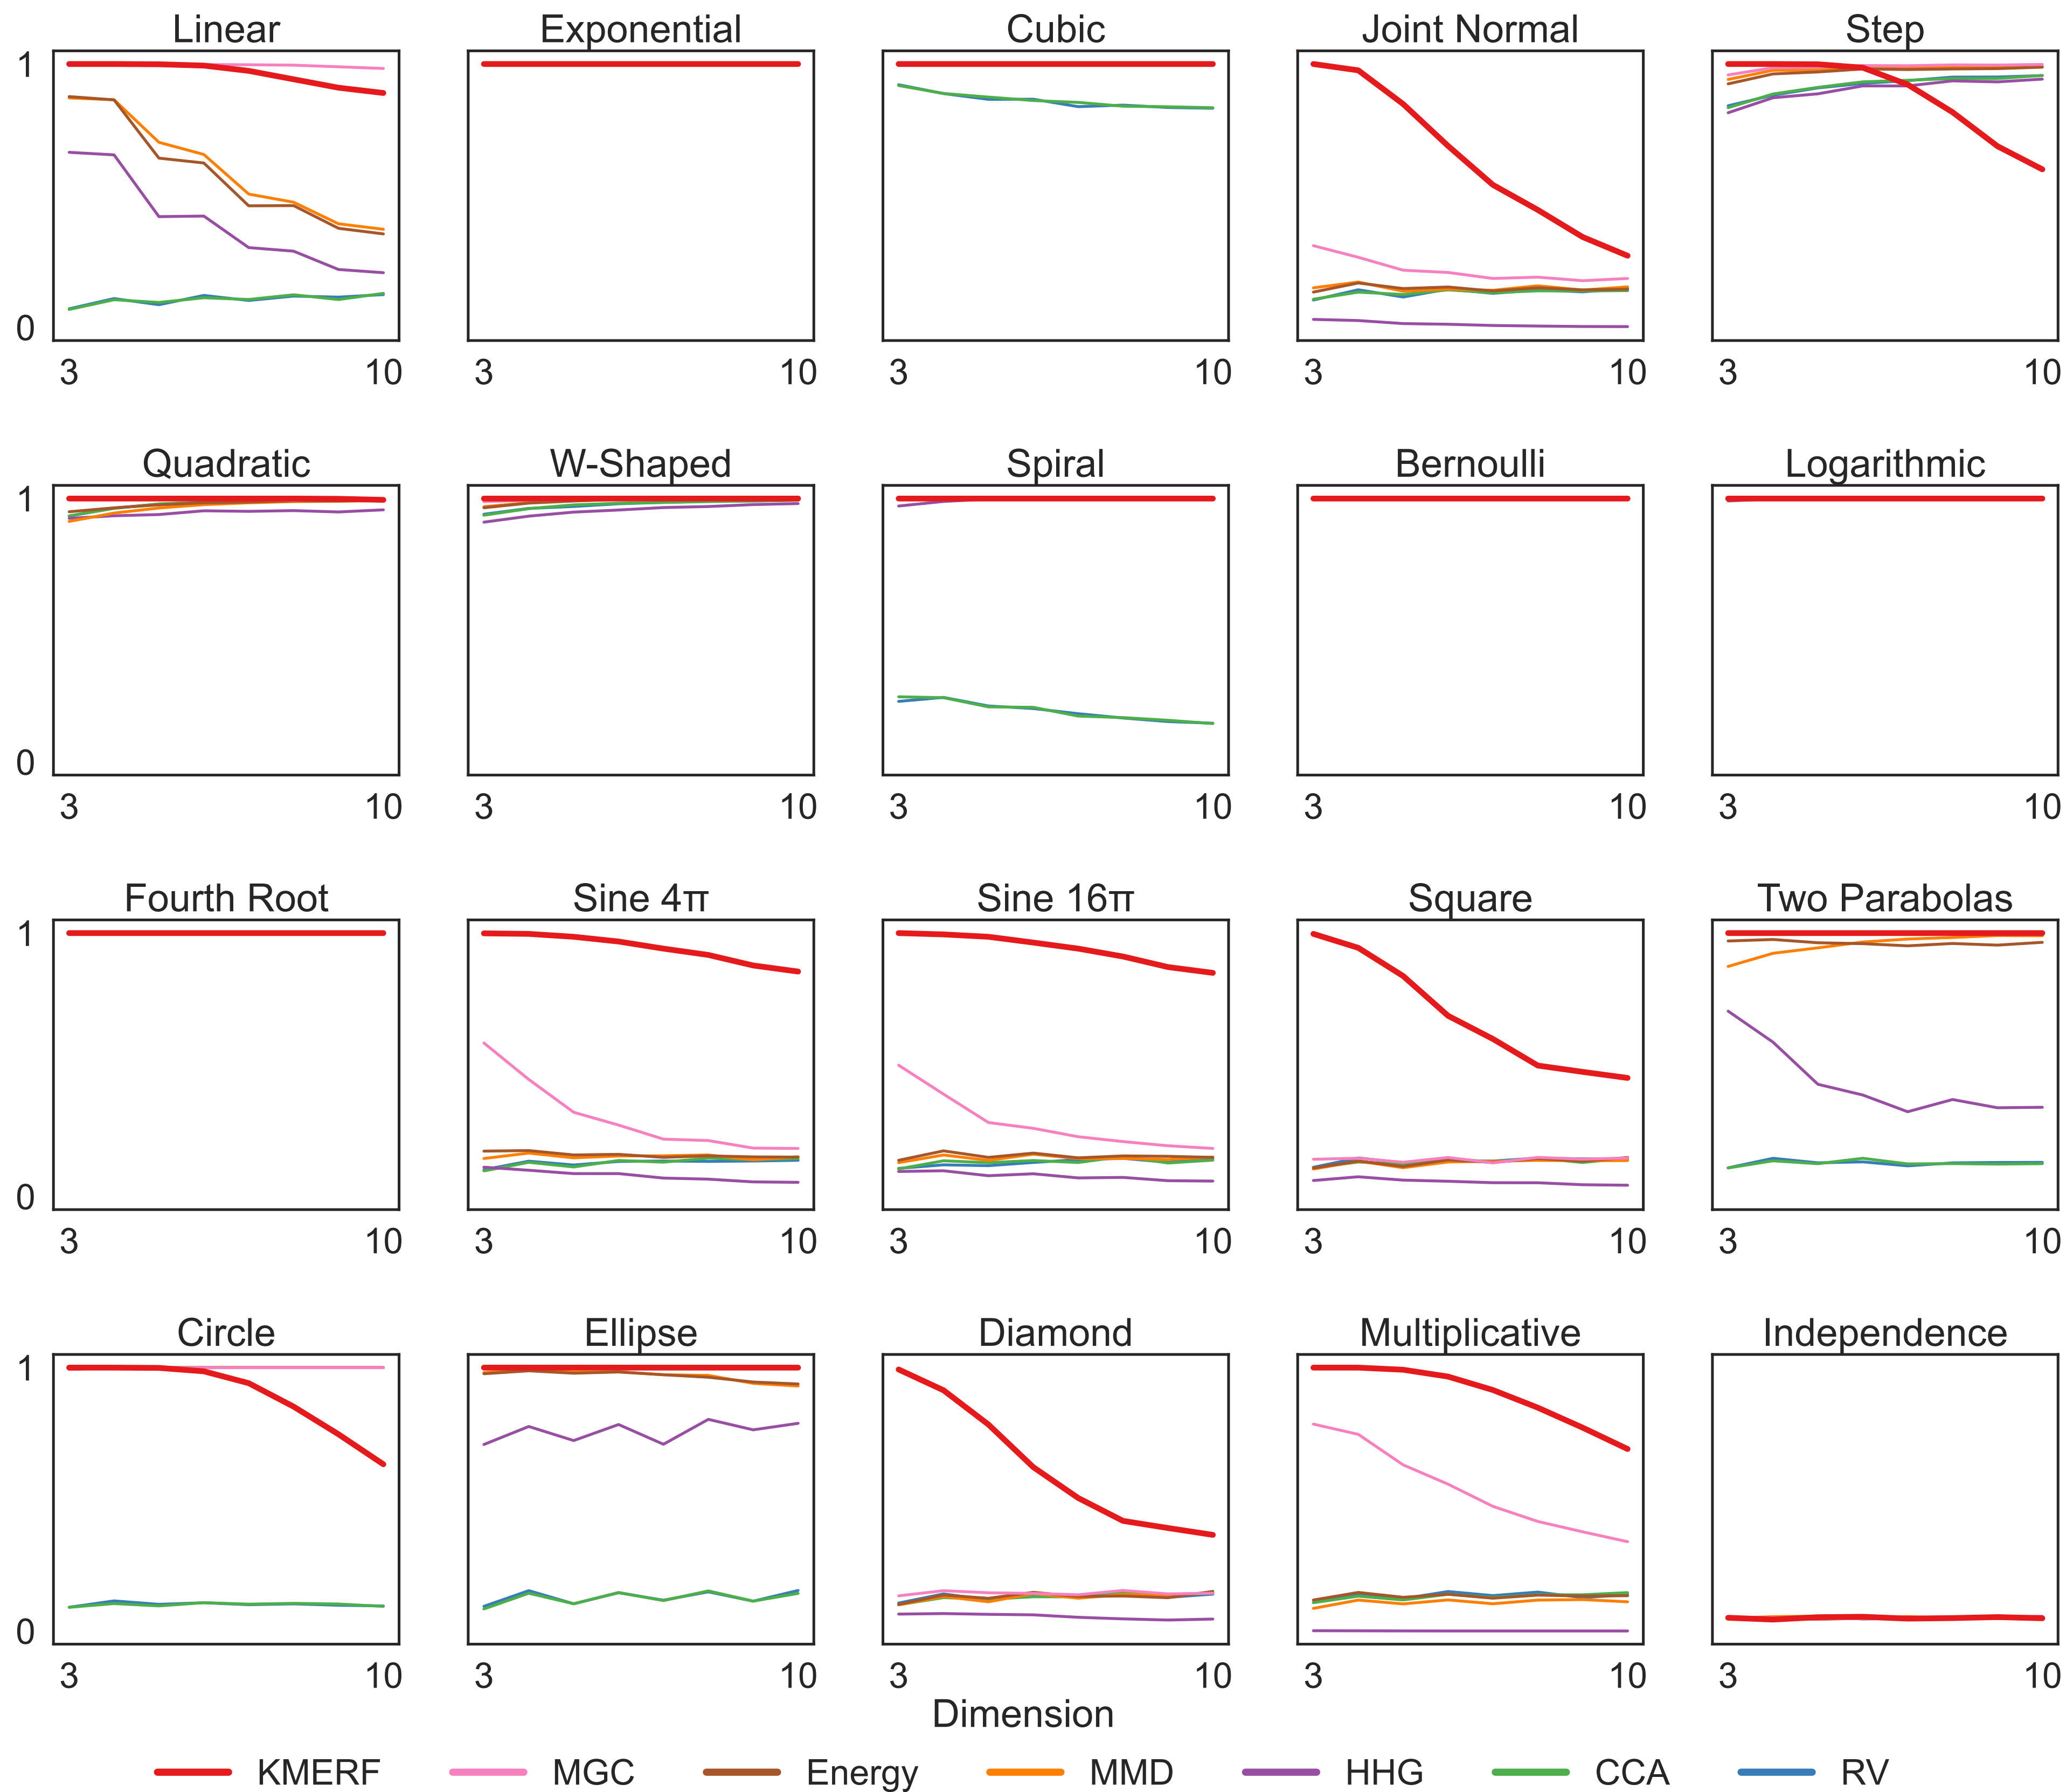

Supplement: supplementary_material [file attachment]

# Feature Importances

Estimated Feature Importance

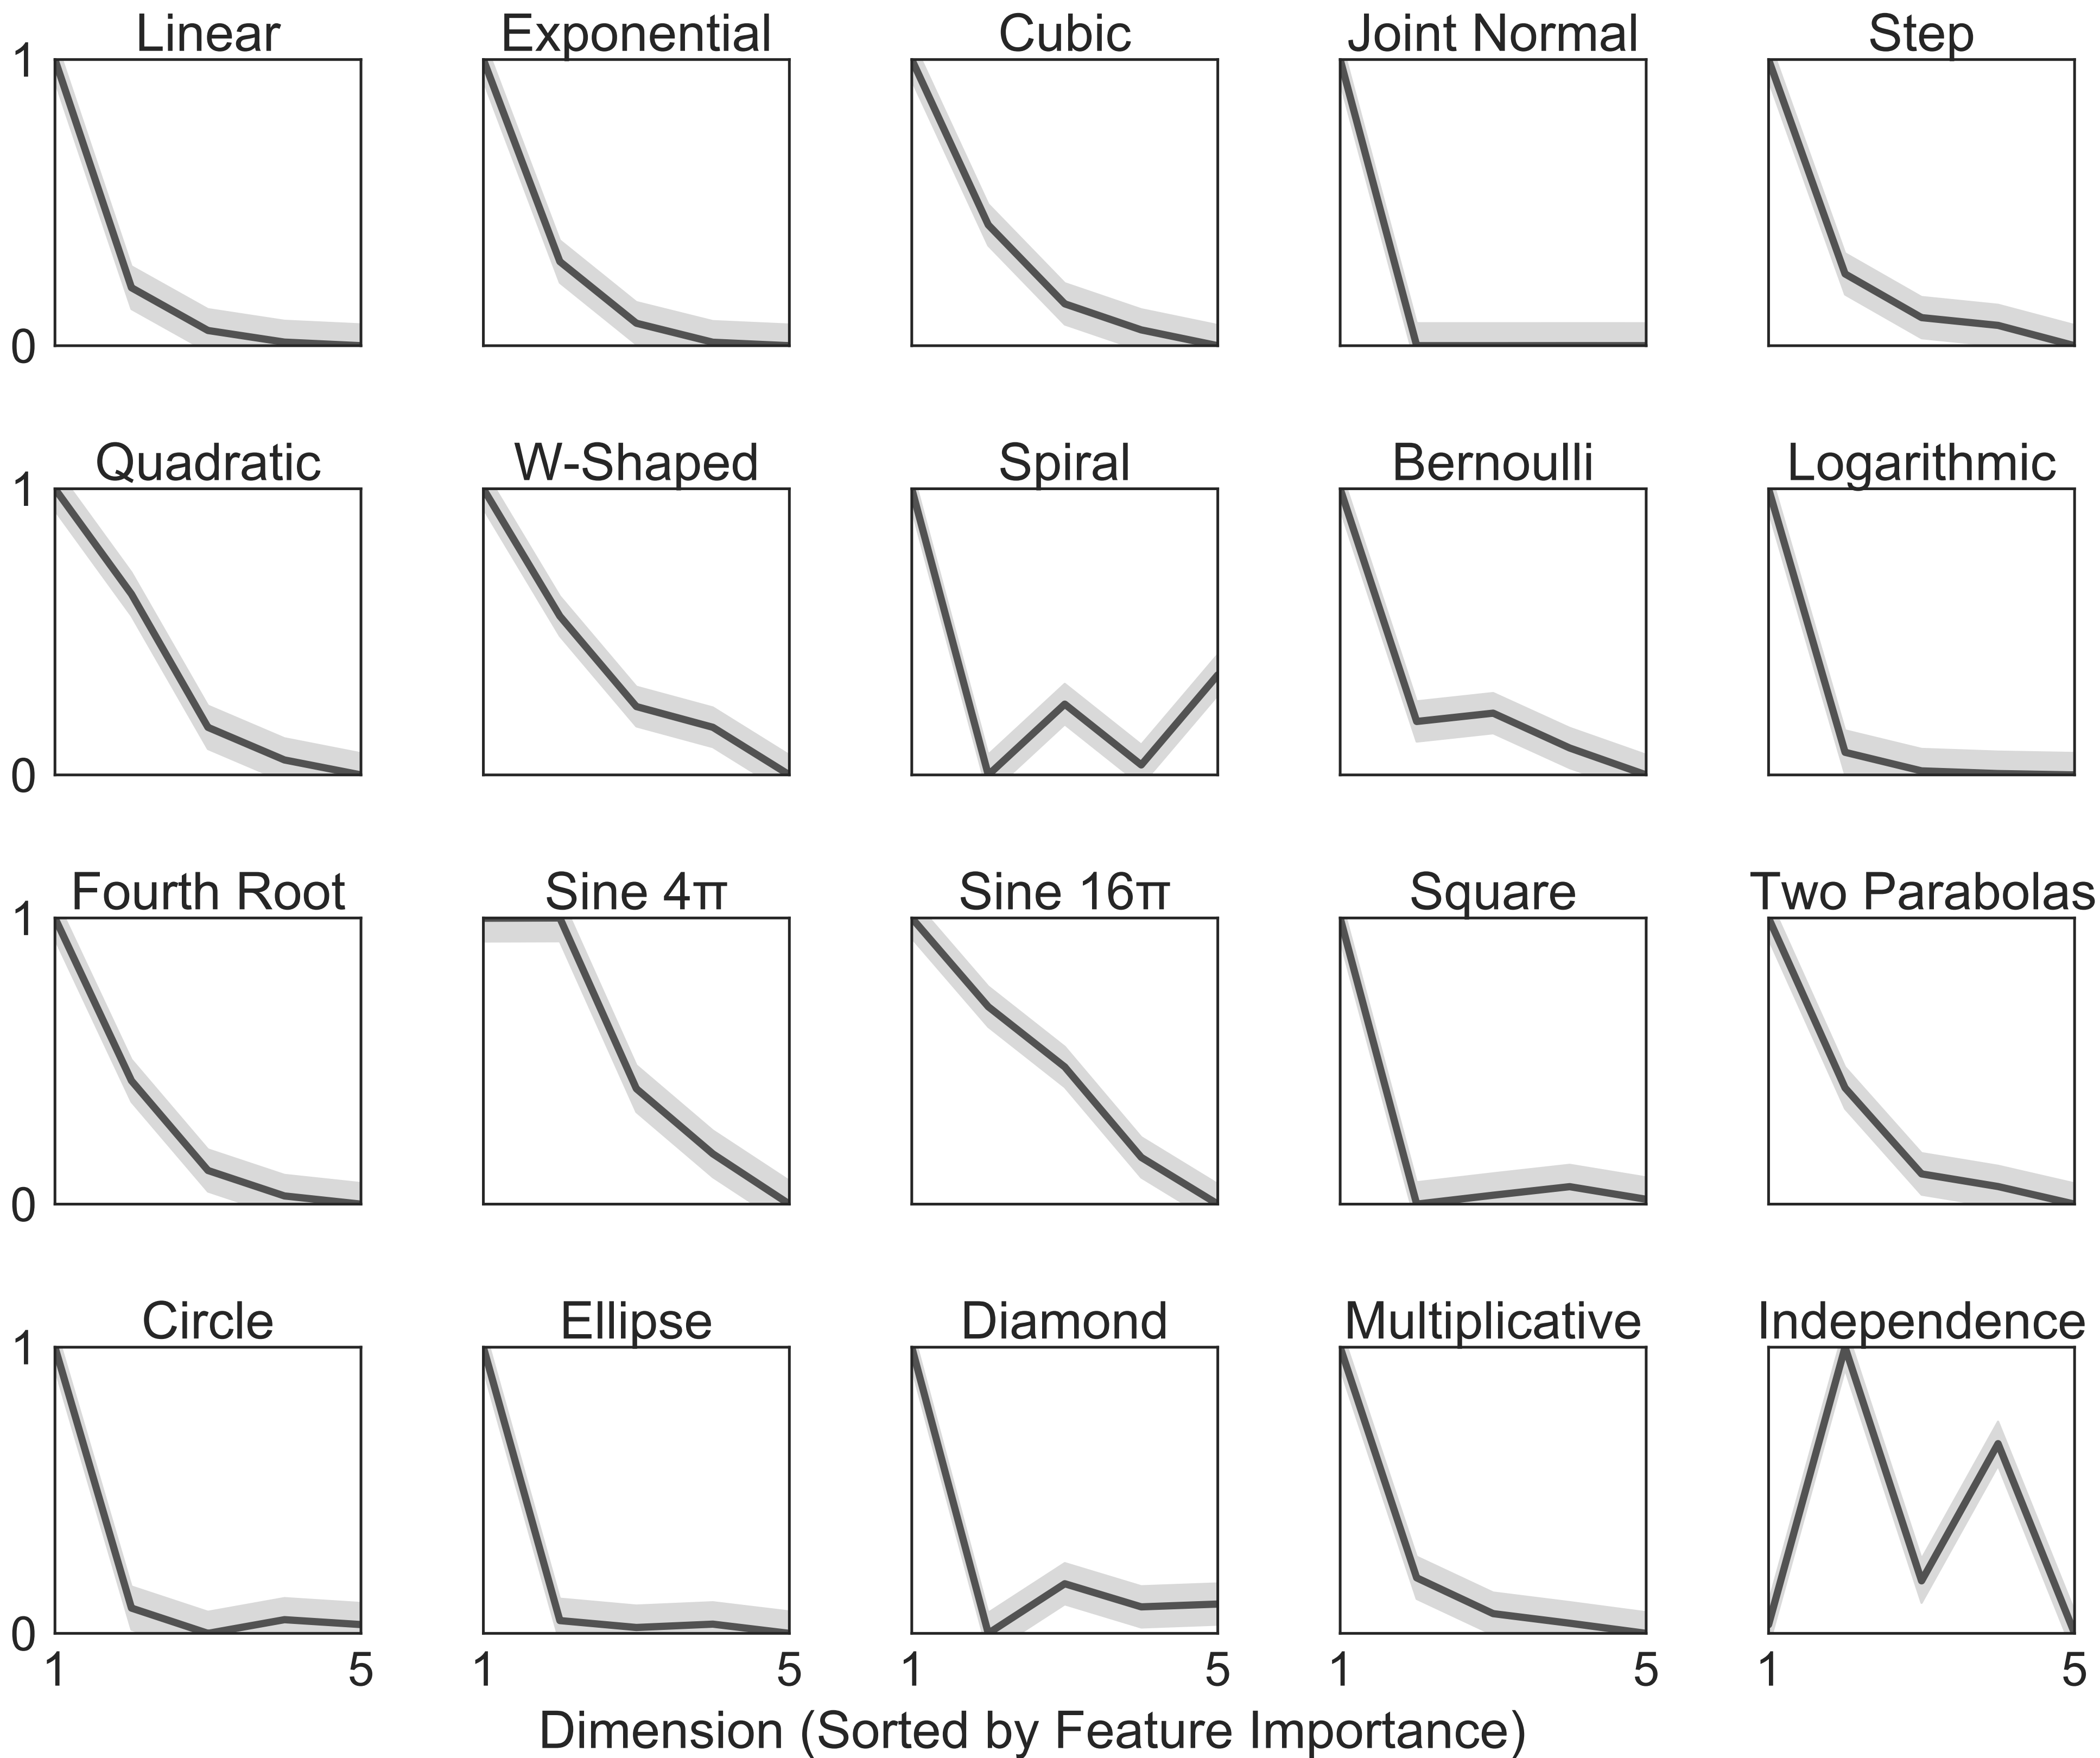

Supplement: supplementary_material [file attachment]

# Multivariate Independence Testing (Increasing Trees)

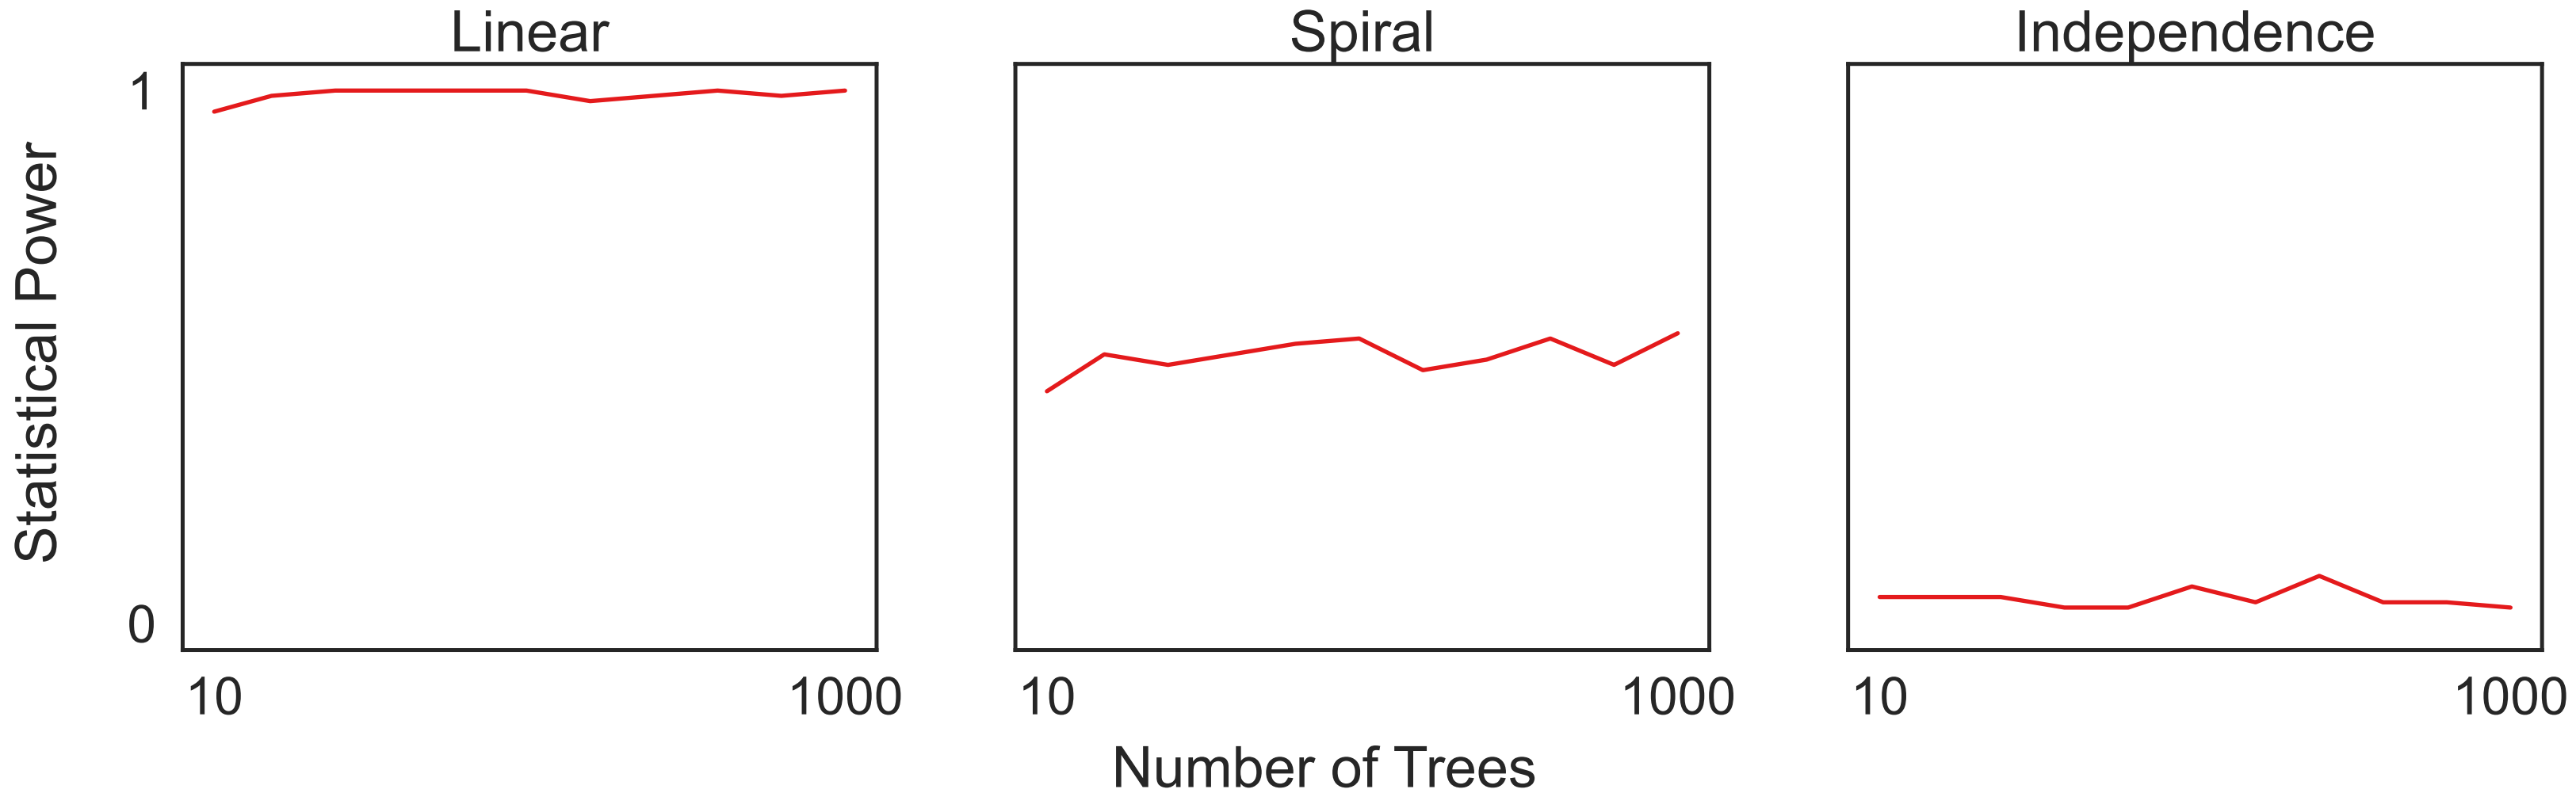

Supplement: supplementary_material [file attachment]

# Multivariate Independence Testing (Increasing Dimension)

Statistical Power

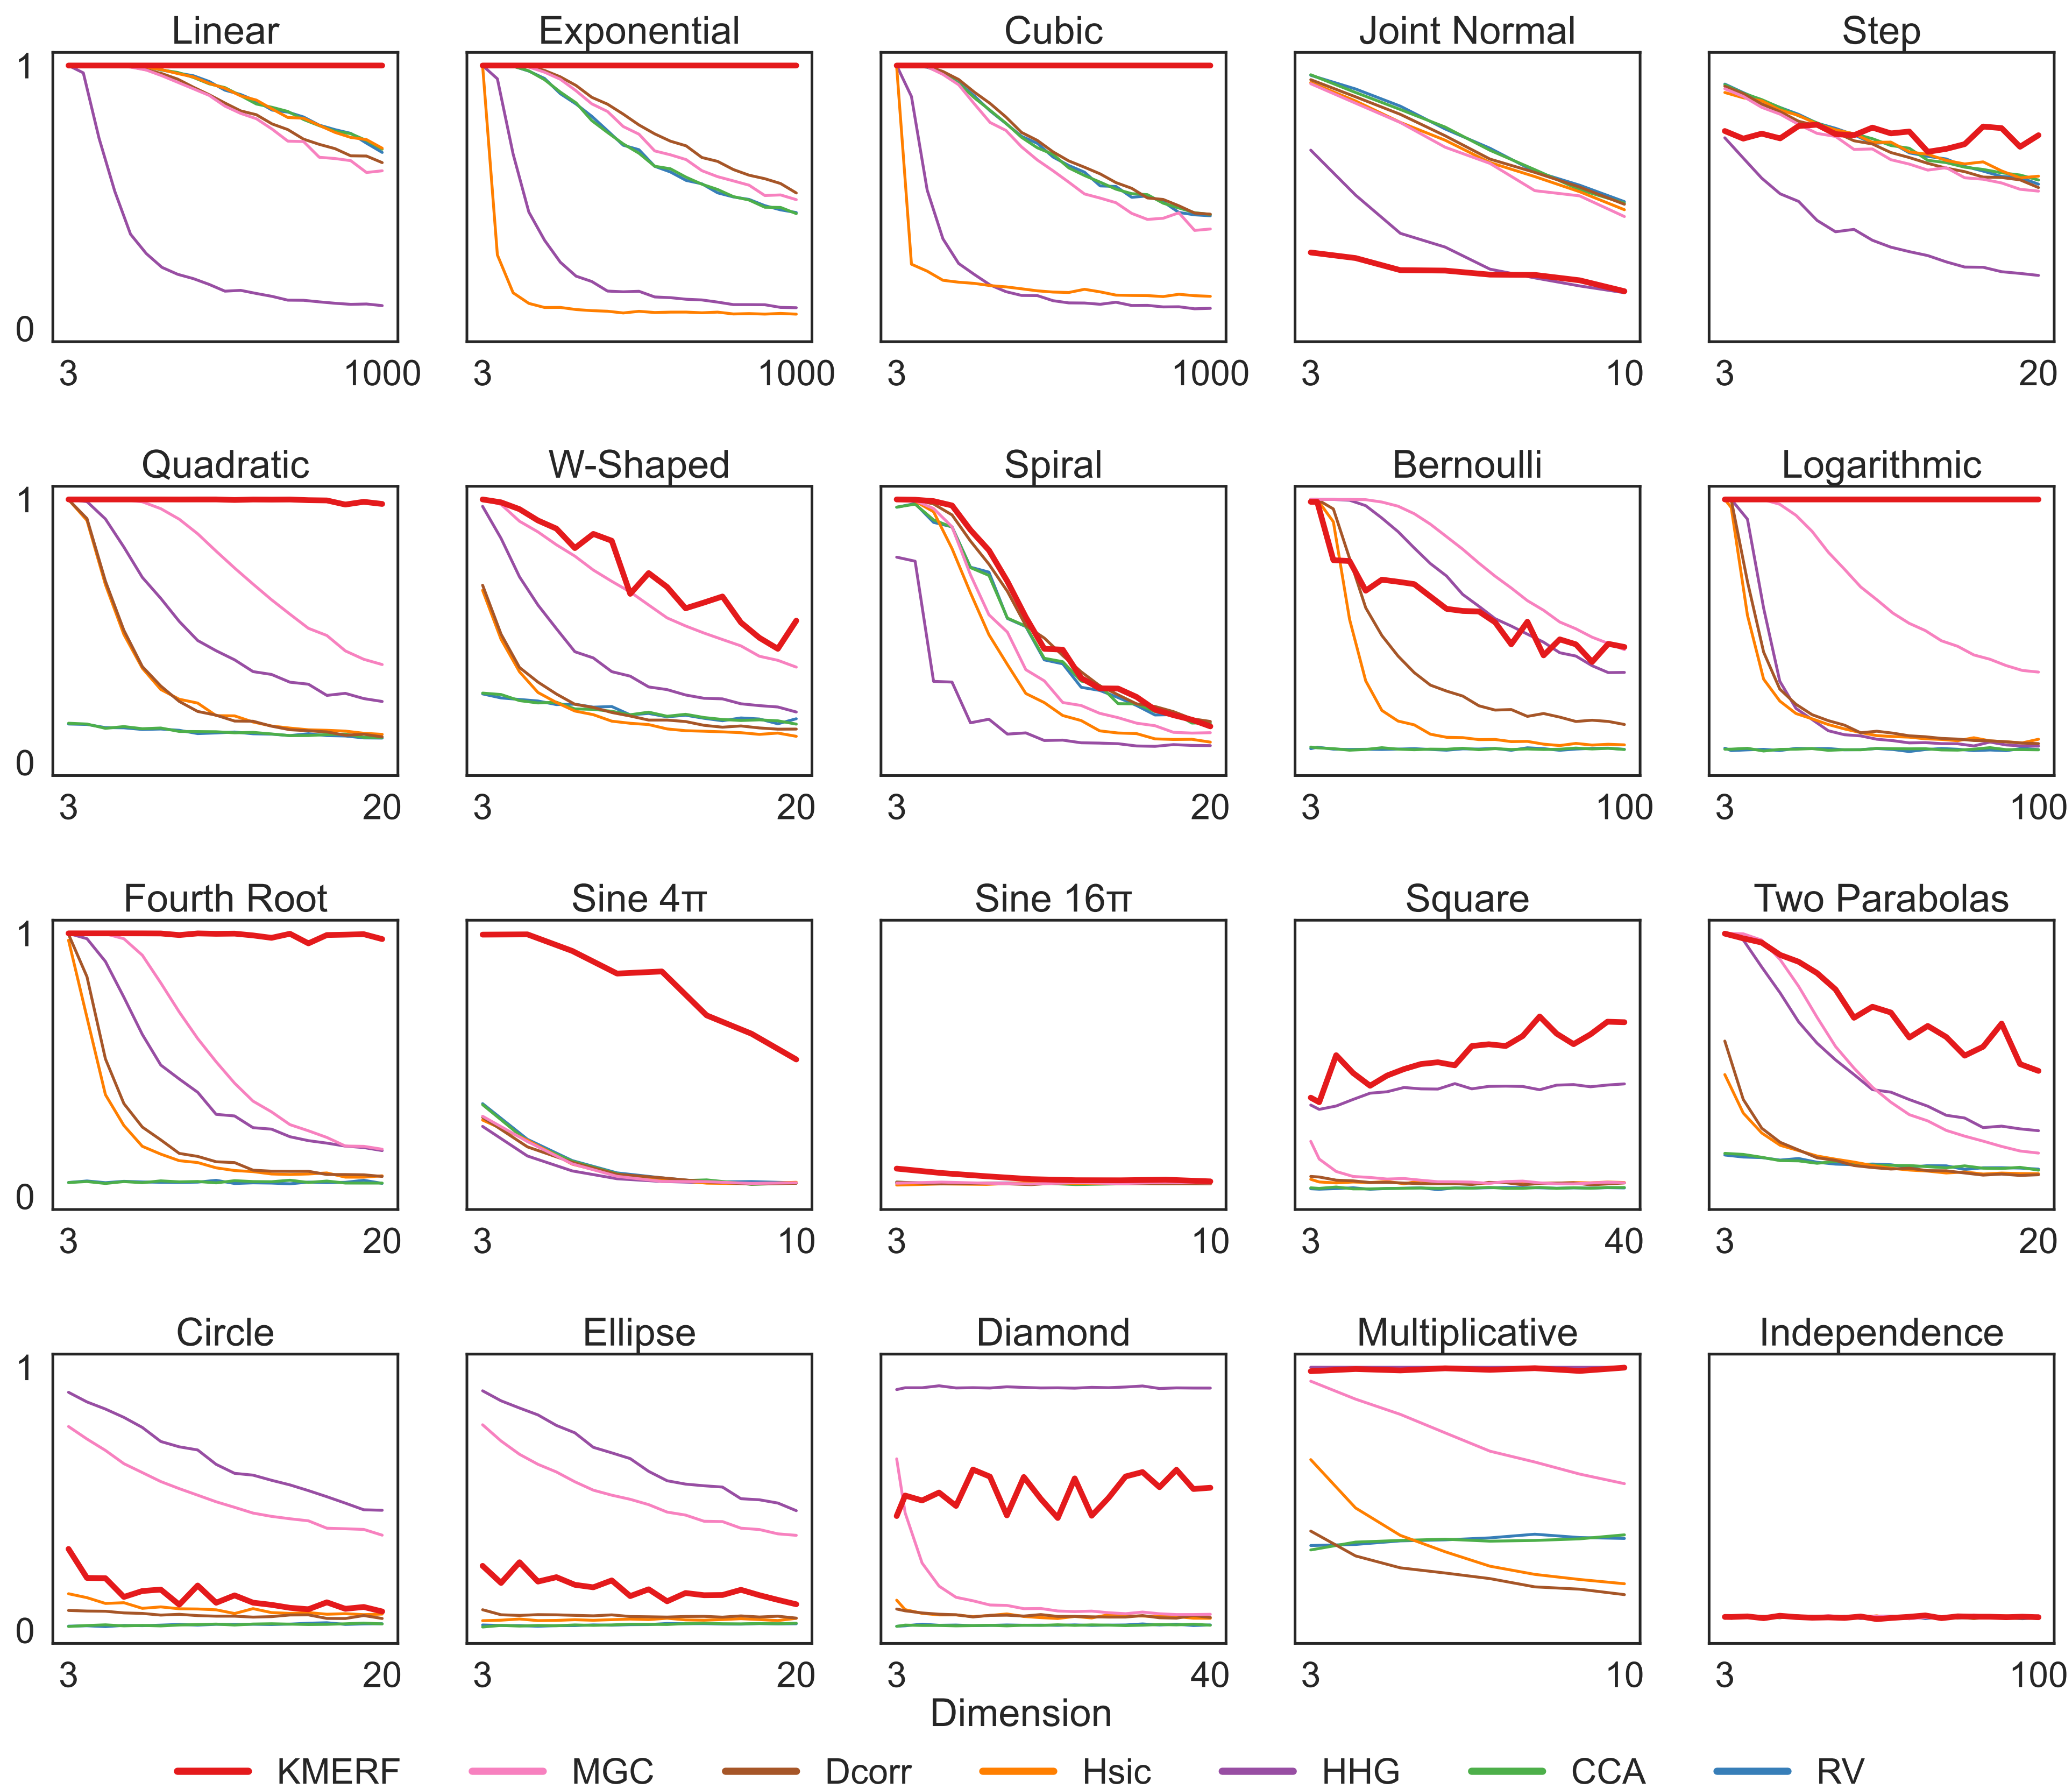

Supplement: supplementary_material [file attachment]
